# Supplementary material
Source: PubMed Central journal article supplement (PMC3811825)
Supplement: IAI.01054-13_zii999090388so1.pdf [file IAI.01054-13_zii999090388so1.pdf]

Figure S1

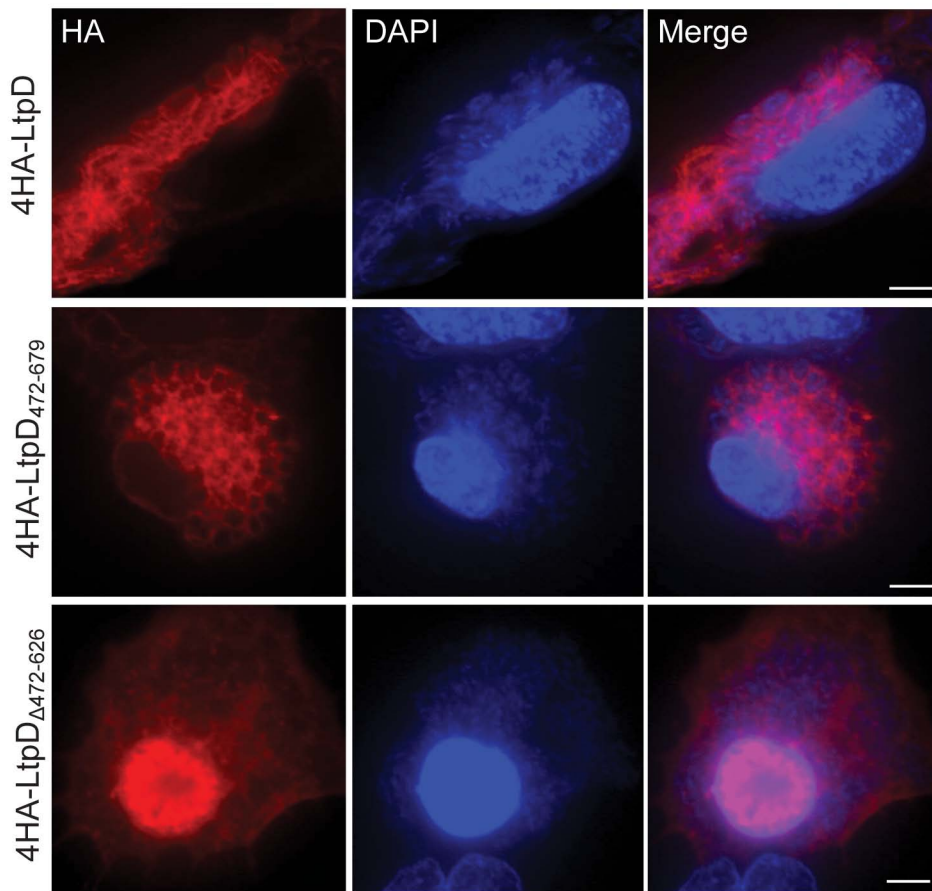

**Figure S1. The internal region of LtpD, LtpD<sub>472-626</sub>, is required for localization of LtpD to the LCV.** A549 cells were infected for 24 hours with WT *L. pneumophila* 130b expressing 4HA-LtpD, 4HA-LtpD<sub>472-679</sub> or 4HA-LtpD<sub>Δ472-626</sub> and stained using anti-HA antibody (red) and DAPI DNA stain (blue). 4HA-LtpD and 4HA-LtpD<sub>472-679</sub> localized to the LCV, while 4HA-LtpD<sub>Δ472-626</sub> displayed diffuse, cytosolic and strong nuclear localisation. Results are representative of two separate experiments. Scale bar 10  $\mu$ m.

Figure S2

A

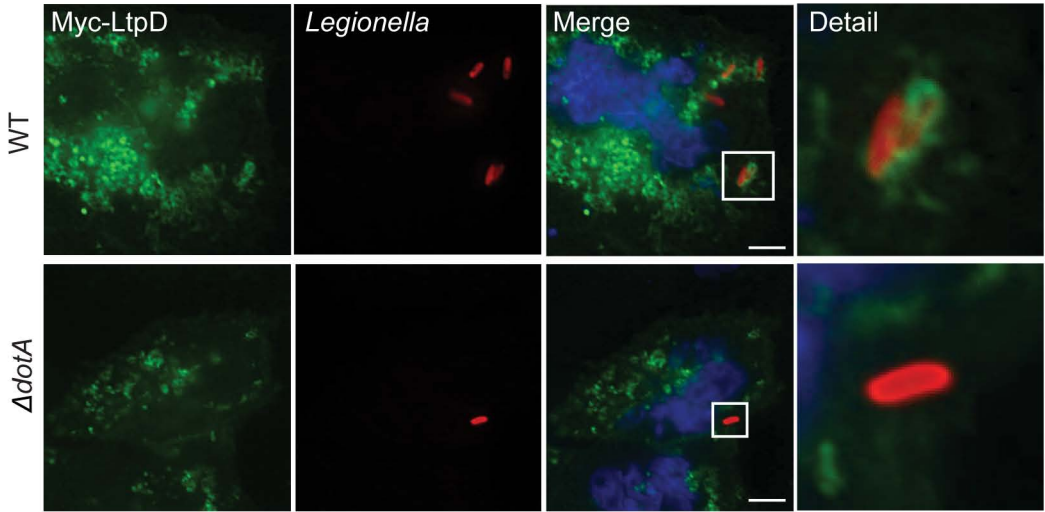

B

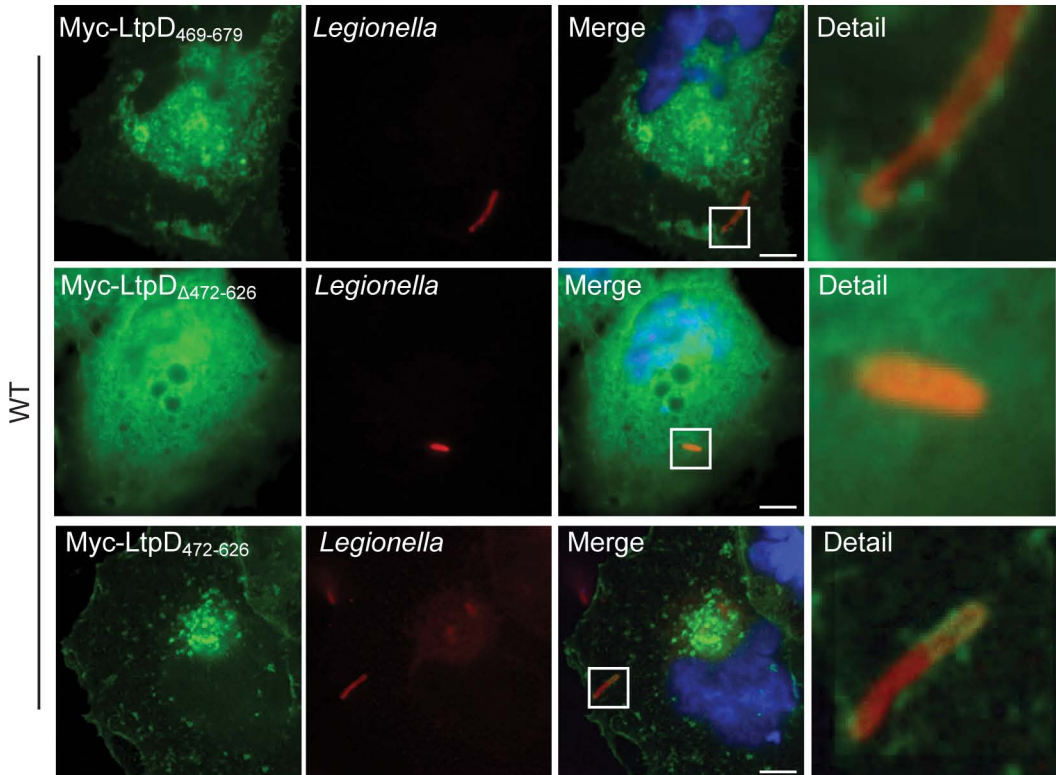

**Figure S2. LtpD<sub>472-626</sub> is necessary and sufficient for the recruitment of ectopically-expressed Myc-LtpD to the LCV.** Immunofluorescence images of A549 cells transfected with Myc-LtpD, Myc-LtpD $\Delta$ <sub>472-626</sub> or Myc-LtpD<sub>472-626</sub> and then infected with WT or  $\Delta dotA$  *L. pneumophila*. (A) Myc-LtpD is recruited to the LCV of WT but not  $\Delta dotA$  bacteria during infection. (B) Transfection of Myc-LtpD<sub>469-679</sub>, Myc-LtpD<sub>472-626</sub> or Myc-LtpD $\Delta$ <sub>472-626</sub> demonstrates that LtpD<sub>472-626</sub> is sufficient for the recruitment of Myc-LtpD to the LCV during infection. Results are representative of at least three experiments. Scale bar 10  $\mu$ m.

Figure S3

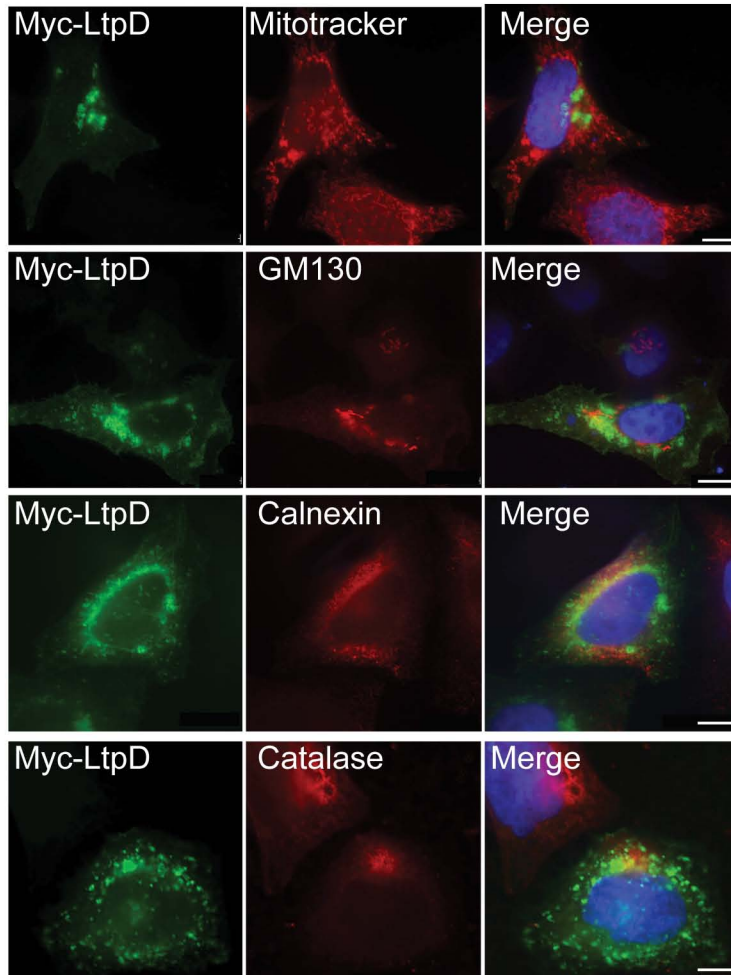

**Figure S3. Myc-LtpD does not co-localize with selected cellular organelles.** HeLa cells were transfected with Myc-LtpD and stained using antibodies for selected cellular markers. To visualize mitochondria, live cells were loaded with Mitotracker, cells were then fixed and stained with anti-Myc antibody. No significant co-localization between Myc-LtpD and Mitotracker, calnexin, GM130 or catalase was observed. Results are representative of at least three independent experiments. Scale bar 10  $\mu\text{m}$ .

Figure S4

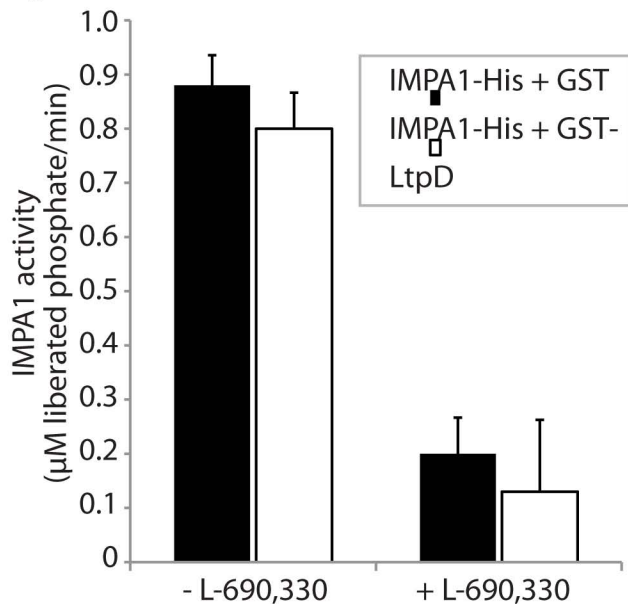

**Figure S4. LtpD does not affect IMPA1 activity *in vitro*.** Free phosphate released by His-IMPA1 from the substrate inositol monophosphate was quantified using the Malachite green assay. Incubation of IMPA1 with the substrate resulted in the release of phosphate however the addition of GST alone or GST-LtpD did not affect the quantity of phosphate released. The specific inhibitor L-690,330 was able to prevent IMPA1 activity. Results mean of two separate experiments performed in triplicate  $\pm$  standard deviation.

**Table S1. Plasmids and primers used in this study**

| Plasmid                | Description                                                                                                                                                                                                   |                                                                                |                  | Reference       |
|------------------------|---------------------------------------------------------------------------------------------------------------------------------------------------------------------------------------------------------------|--------------------------------------------------------------------------------|------------------|-----------------|
| <b>pRK5</b>            | <b>Vector for the expression of proteins with N-terminal HA or Myc tag in mammalian cells</b>                                                                                                                 |                                                                                |                  | <b>Clontech</b> |
| <i>pRK5-derived</i>    | <i>Expressed protein</i>                                                                                                                                                                                      | <i>Primers 5' -&gt; 3'</i>                                                     | <i>RS</i>        |                 |
| pICC1247               | Myc-LtpD                                                                                                                                                                                                      | CACTGACCCGGGAACCAAGAAACATTTAAATCCAGAC<br>GTCGCAAAGCTTCTAAATCTTTAAACCAGTGTCGC   | HindIII<br>BamHI | This study      |
| pICC1248               | Myc-LtpD <sub>1-469</sub>                                                                                                                                                                                     | CACTGACCCGGGAACCAAGAAACATTTAAATCCAGAC<br>CAGTCAAGCTTCTACTGAGTTTCAGGTAGGAGGGGC  | HindIII<br>BamHI | This study      |
| pICC1249               | Myc-LtpD <sub>472-679</sub>                                                                                                                                                                                   | GTATGGAATTCATGGACAGAGACAGAGACAGAGACA<br>GTCGCAAAGCTTCTAAATCTTTAAACCAGTGTCGC    | EcoRI<br>BamHI   | This study      |
| pICC1250               | Myc-LtpD <sub>556-679</sub>                                                                                                                                                                                   | CACTAACCCGGGAAGCAACAAATGGGCAAGAAC<br>GTCGCAAAGCTTCTAAATCTTTAAACCAGTGTCGC       | XmaI<br>BamHI    | This study      |
| pICC1251               | Myc-LtpD <sub>626-679</sub>                                                                                                                                                                                   | CACTAACCCGGGAATCAAATTCATCAGACGAAACG<br>GTCGCAAAGCTTCTAAATCTTTAAACCAGTGTCGC     | XmaI<br>BamHI    | This study      |
| pICC1252               | Myc-LtpD <sub>472-556</sub>                                                                                                                                                                                   | CACTAACCCGGGAAGAGACAGAGACAGAGACAG<br>GTCGCAAAGCTTCTAGTTTCAAACGCTGATTG          | XmaI<br>HindIII  | This study      |
| pICC1253               | Myc-LtpD <sub>472-626</sub>                                                                                                                                                                                   | CACTAACCCGGGAAGAGACAGAGACAGAGACAG<br>GTCGCAAAGCTTGCCTACCCTTTGCGTCCCTTTTC       | XmaI<br>HindIII  | This study      |
| pICC1254               | Myc-LtpD <sub>Δ472-626</sub>                                                                                                                                                                                  | See text for details                                                           |                  | This study      |
| pICC1255               | Myc-LtpD <sub>Δ472-556</sub>                                                                                                                                                                                  | See text for details                                                           |                  | This study      |
| <b>pICC1341</b>        | <b>pRK5-HA, Vector for the expression of proteins with N-terminal HA in mammalian cells; generated by replacing the Myc-tag of pRK5-Myc by an phosphorylated, annealed oligo cassette encoding the HA tag</b> |                                                                                |                  | This study      |
|                        |                                                                                                                                                                                                               | CCACCATGGCGTACCCATACGATGTTCCAGATTACGCTGGCGCGG                                  | NA               |                 |
|                        |                                                                                                                                                                                                               | GATCCCGCGCCAGCGTAATCTGGAACATCGTATGGGTACGCCATGGTGG                              | NA               |                 |
| pICC1342               | HA-SetA <sub>PIP3(401-631)</sub>                                                                                                                                                                              | CACTGAGGATCCGTAATCCAACGGCTCAAGAAT<br>TCGCAGAATTTCTATATTCTTAAACCATGATTGTTATCGT  | BamHI<br>EcoRI   | This study      |
| pICC1343               | HA-SidC <sub>PIP4</sub>                                                                                                                                                                                       | GTCATAGGATCCAATATTCCTCCAAGCCATTATTGG<br>GATACCCTGCAGTATTCTTTATAACTCCCGTGTAC    | BamHI<br>PstI    | This study      |
| <b>pGBT9</b>           | <b>Vector for the expression of GAL4 DNA-binding domain (DNA-BD) fusion proteins in yeast</b>                                                                                                                 |                                                                                |                  | <b>Clontech</b> |
| <i>pGBT9-derived</i>   | <i>Expressed protein</i>                                                                                                                                                                                      | <i>Primers 5' -&gt; 3'</i>                                                     | <i>RS</i>        |                 |
| pICC1268               | DNA-BD-LtpD                                                                                                                                                                                                   | CACTGAGAATTCACCAAGAAACATTTAAATCCAGACTC<br>AGCTGCTGCAGCTAAATCTTTAAACCAGTGTCGC   | EcoRI<br>PstI    | This study      |
| pICC1270               | DNA-BD-LtpD <sub>1-469</sub>                                                                                                                                                                                  | CACTGAGAATTCACCAAGAAACATTTAAATCCAGACTC<br>CAGTCAAGCTTCTACTGAGTTTCAGGTAGGAGGGGC | EcoRI<br>BamHI   | This study      |
| pICC1269               | DNA-BD-LtpD <sub>472-679</sub>                                                                                                                                                                                | CACTAACCCGGGAGAGACAGAGACAGAGACAG<br>AGCTGCTGCAGCTAAATCTTTAAACCAGTGTCGC         | XmaI<br>PstI     | This study      |
| <b>pGADT7</b>          | <b>Vector for the expression of activation domain (AD) fusion proteins in yeast</b>                                                                                                                           |                                                                                |                  | <b>Clontech</b> |
| <i>pGADT7-derived</i>  | <i>Expressed protein</i>                                                                                                                                                                                      | <i>Primers 5' -&gt; 3'</i>                                                     | <i>RS</i>        |                 |
| pICC1261               | AD-IMPA1                                                                                                                                                                                                      | CTAATCCCGGGAATGGCTGATCCTTGGCAGGAATGC<br>GCGATCATGATTTAATCTTCGTCGTCGTTGCAAAGG   | XmaI<br>ClaI     | This study      |
| <b>pICC562</b>         | <b>pMMB207c-4HA; Vector for the expression of proteins with four N-terminal HA-tags in <i>L. pneumophila</i></b>                                                                                              |                                                                                |                  | (1)             |
| <i>pICC562-derived</i> | <i>Expressed protein</i>                                                                                                                                                                                      | <i>Primers 5' -&gt; 3'</i>                                                     | <i>RS</i>        |                 |
| pICC1265               | 4HA-LtpD                                                                                                                                                                                                      | CACTGACCCGGGAACCAAGAAACATTTAAATCCAGAC<br>GTCGCAAAGCTTCTAAATCTTTAAACCAGTGTCGC   | XmaI<br>HindIII  | This study      |
| pICC1266               | 4HA-LtpD <sub>1-469</sub>                                                                                                                                                                                     | CACTGACCCGGGAACCAAGAAACATTTAAATCCAGAC<br>CAGTCAAGCTTCTACTGAGTTTCAGGTAGGAGGGGC  | XmaI<br>HindIII  | This study      |
| pICC1267               | 4HA-LtpD <sub>472-679</sub>                                                                                                                                                                                   | GTATGGTACCATGGGACAGAGACAGAGACAGAGACA<br>GTCGCAAAGCTTCTAAATCTTTAAACCAGTGTCGC    | KpnI<br>HindIII  | This study      |
| pICC1344               | 4HA-SetA <sub>PIP3(401-631)</sub>                                                                                                                                                                             | CACTGAGGTACCGTAATCCAACGGCTCAAGAAT<br>TCGCATCTAGATTATATTCTTAAACCATGATTGTTATCGT  | KpnI<br>XbaI     | This study      |

| <b>pGEX-6P-2</b>                                                                   |                                                 |                                                                                  |               | <b>GE Healthcare</b> |
|------------------------------------------------------------------------------------|-------------------------------------------------|----------------------------------------------------------------------------------|---------------|----------------------|
| <b>Vector for the expression of a GST fusion protein in <i>E. coli</i></b>         |                                                 |                                                                                  |               |                      |
| pGEX-6P2-derived                                                                   | Expressed protein                               | Primers 5' -> 3'                                                                 | RS            |                      |
| pICC1345                                                                           | GST-LtpD                                        | GTATGGAATTCAAACCAAGAAACATTAAATCCAGACTC<br>GACGTCGCGGCCGCTAAATCTTTAAACCAGTGTCCG   | EcoRI<br>NotI | This study           |
| pICC1346                                                                           | GST-LtpD <sub>472-626</sub>                     | GTATGGAATTCATGAGACAGAGACAGAGACAGAGACA<br>GACGTCGCGGCCGCTAAATCTTTAAACCAGTGTCCG    | EcoRI<br>NotI | This study           |
| <b>pET28a(+)</b>                                                                   |                                                 |                                                                                  |               | <b>Novagen</b>       |
| <b>Vector for the expression of a 6 x His tag fusion protein in <i>E. coli</i></b> |                                                 |                                                                                  |               |                      |
| pET28a(+)-derived                                                                  | Expressed protein                               | Primers 5' -> 3'                                                                 | RS            |                      |
| pICC1259                                                                           | His-IMPA1                                       | GGCTAGAGCTCATGGCTGATCCTTGGCAGGAATGC<br>GGACTGCGGCCGCTTAATCTTCGTCGTCGTTGCAAAGG    | SacI<br>NotI  | This study           |
| <b>pcDNA</b>                                                                       |                                                 |                                                                                  |               | <b>Invitrogen</b>    |
| <b>Vector for the expression FLAG tag fusion proteins in mammalian cells</b>       |                                                 |                                                                                  |               |                      |
| pcDNA-derived                                                                      | Expressed protein                               | Primers 5' -> 3'                                                                 | RS            |                      |
| pICC1263                                                                           | FLAG-IMPA1                                      | CTAATCCCGGAAATGGCTGATCCTTGGCAGGAATGC<br>GGACTCTGCAGTTAATCTTCGTCGTCGTTGCAAAGG     | XmaI<br>PstI  | This study           |
| <b>Primers for construction of the <math>\Delta</math><i>ltpD</i> strain</b>       |                                                 |                                                                                  |               |                      |
|                                                                                    | Amplification of the 5' flanking region         | GATGTCTCTGATATCCATAAGATTTTC<br>GGTACGAATTCATGATATCTCTCTGAATAATTCGC               | NA            | This study           |
|                                                                                    | Amplification of the 3' flanking region         | GGTACGAATTCGGACGCAAAGTGGTAGCGCAATCAAATTC<br>GGTGCAAATCATTATGGCTTCGCGACTTATTTATGG | NA            | This study           |
|                                                                                    | Confirmation primer upstream 5' flanking region | CGCTAATTATCAAACGTACATTTAACTC                                                     | NA            | This study           |
|                                                                                    | Confirmation primer upstream 5' flanking region | CCATTTTATATGTTGCAGTCGCC                                                          | NA            | This study           |

RS = restriction site

## References

1. Dolezal P, Aili M, Tong J, Jiang JH, Marobbio CM, Lee SF, Schuelein R, Belluzzo S, Binova E, Mousnier A, Frankel G, Giannuzzi G, Palmieri F, Gabriel K, Naderer T, Hartland EL, Lithgow T. 2012. *Legionella pneumophila* Secretes a Mitochondrial Carrier Protein during Infection. PLoS Pathog 8:e1002459.

**Table S2. Hits of the LtpD yeast-2-hybrid screen**

| <b>Gene Name</b>                                               | <b>No. of hits</b> |
|----------------------------------------------------------------|--------------------|
| Structural maintenance of chromosomes 4 (SMC4)                 | 1                  |
| Myotrophin (MTPN) Leucine repeat protein                       | 1                  |
| (myo)-Inositol-1(or 4)-monophosphatase 1 (IMPA1)               | 1                  |
| E3 ubiquitin-protein ligase (RNF8)                             | 2                  |
| Leucine rich repeat containing 59 (LRRC59)                     | 1                  |
| Splicing factor, arginine/serine-rich 11 (SFRS11)              | 1                  |
| COX11 homolog                                                  | 1                  |
| Activating transcription factor 7 interacting protein (ATF71P) | 1                  |
